# Supplementary material for: A Multi-Ingredient Supplement Protects against Obesity and Infertility in Western Diet-Fed Mice
Source: MDPI journal article supplement (doi:10.3390/nu15030611), 2023-01-25
Supplement: s1 [file s1]

## Supporting information:

**Figure S1.** Pair-feeding experiment comparing lipolytic effects of the weight loss-driving ingredients in the Fertility Enhancer diet (T7) vs. calorie-matched, pair-fed controls (PT7) in high fat-fed C57 mice.

### Anti-obesity effects of multi-ingredient supplement vs. pairfed controls

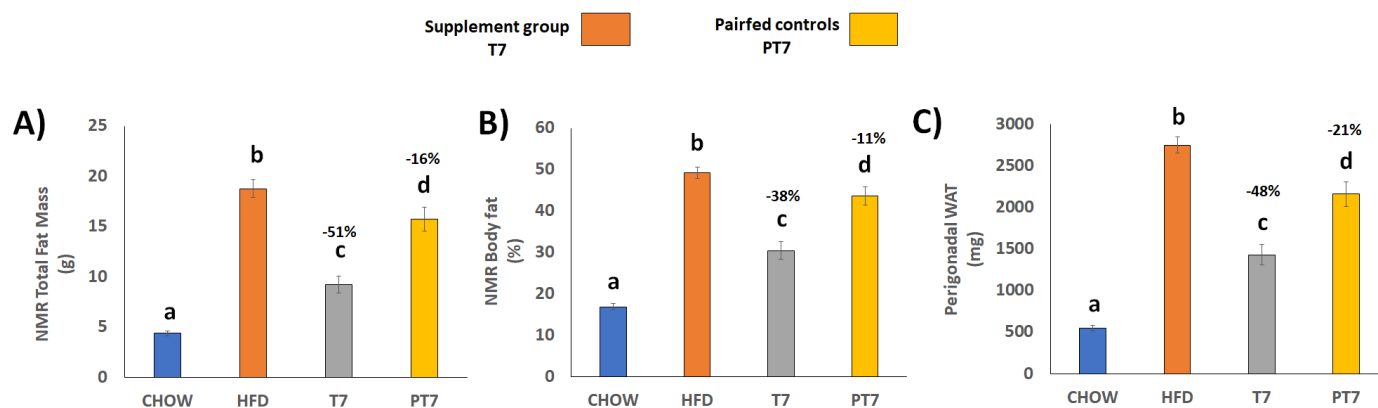

**Figure S1. A). Total fat mass from NMR scan. B). Percent body fat from NMR scan. C). Perigonadal white adipose tissue mass from tissue harvest.** CHOW = low fat-fed, HFD = high fat-fed, T7 = HFD + weight loss-driving ingredients from the Fertility Enhancer, and PT7 = Calorie-matched, pair-fed control group to T7. The caloric intakes of the groups were 12.42 kcals/day for CHOW, 15.21 kcals/day for HFD, and 11.63 kcals/day for T7, with the pair-fed PT7 group receiving the same daily calories as T7. As demonstrated, appetite suppression accounted for 30-40% of the observed weight loss in animals receiving the T7 multi-ingredient supplement (e.g., alpha lipoic acid, coQ10, vitamin E, green tea extract, green coffee bean extract, forskolin extract, and beetroot extract). Groups with different letters are significantly different ( $p < 0.05$ )

**Table S1.** Ovarian and testicular messenger RNA levels.

|                                                        | LF        | HF                | FE                | One-way ANOVA      |
|--------------------------------------------------------|-----------|-------------------|-------------------|--------------------|
| <b><u>Ovarian mRNA</u></b>                             |           |                   |                   |                    |
| <b>Fold change (<math>2^{-\Delta\Delta CT}</math>)</b> |           |                   |                   |                    |
| TNF-a                                                  | 1.1 ± 0.2 | 1.3 ± 0.4         | 0.7 ± 0.2         | NS                 |
| IL-1b                                                  | 1.1 ± 0.2 | <b>3.3 ± 1.1*</b> | <b>0.7 ± 0.2§</b> | <b>p = 0.023</b>   |
| Casp 1                                                 | 0.8 ± 0.1 | <b>2.0 ± 0.4*</b> | 1.1 ± 0.3         | <b>p = 0.033</b>   |
| p21                                                    | 1.1 ± 0.2 | 1.6 ± 0.4         | 1.6 ± 0.3         | NS                 |
| Casp 3                                                 | 1.0 ± 0.1 | 1.1 ± 0.2         | 1.1 ± 0.1         | NS                 |
| Casp 9                                                 | 1.0 ± 0.1 | 1.2 ± 0.4         | 1.1 ± 0.3         | NS                 |
| ND1                                                    | 1.1 ± 0.2 | 0.8 ± 0.1         | 0.7 ± 0.1         | NS                 |
| SDHA                                                   | 1.1 ± 0.1 | 0.8 ± 0.1         | 1.0 ± 0.1         | NS                 |
| <b><u>Testicular mRNA</u></b>                          |           |                   |                   |                    |
| <b>Fold change (<math>2^{-\Delta\Delta CT}</math>)</b> |           |                   |                   |                    |
| TNF-a                                                  | 1.1 ± 0.4 | 2.1 ± 0.3         | 2.9 ± 1.0         | NS                 |
| IL-1b                                                  | 1.0 ± 0.1 | 1.6 ± 0.2         | 1.7 ± 0.3         | NS                 |
| CD86                                                   | 1.1 ± 0.2 | 1.7 ± 0.2         | 1.7 ± 0.3         | NS                 |
| IL6                                                    | 1.2 ± 0.4 | 1.7 ± 0.3         | 2.1 ± 0.8         | NS                 |
| NLRP3                                                  | 1.4 ± 0.6 | 2.5 ± 1.0         | 2.3 ± 0.7         | NS                 |
| Casp 1                                                 | 1.0 ± 0.1 | 1.6 ± 0.2         | 1.7 ± 0.5         | NS                 |
| Casp 3                                                 | 1.0 ± 0.1 | 1.3 ± 0.01        | 1.4 ± 0.3         | p = 0.06           |
| Casp 9                                                 | 1.0 ± 0.1 | 1.4 ± 0.1         | 1.8 ± 0.3         | p = 0.07           |
| PARP1                                                  | 1.0 ± 0.1 | 1.4 ± 0.3         | 1.6 ± 0.2         | NS                 |
| Srebp2                                                 | 1.0 ± 0.2 | 1.3 ± 0.1         | 1.3 ± 0.2         | NS                 |
| AR                                                     | 1.0 ± 0.1 | <b>1.5 ± 0.2*</b> | 1.4 ± 0.1         | <b>p &lt; 0.01</b> |
| ApoA1                                                  | 1.1 ± 0.3 | 1.7 ± 0.8         | 0.8 ± 0.2         | NS                 |
| Lepr                                                   | 1.1 ± 0.2 | 2.0 ± 0.2         | 1.9 ± 0.6         | NS                 |

\*Significantly different from LF ( $p \leq 0.05$ ). § Significantly different from HF ( $p \leq 0.05$ ).
